# Supplementary material for: Provincial Dietary Intake Study (PDIS): Energy and Macronutrient Intakes of Children in a Representative/Random Sample of 1–<10-Year-Old Children in Two Economically Active and Urbanized Provinces in South Africa
Source: MDPI journal article supplement (doi:10.3390/ijerph17051717), 2020-03-05
Supplement: s1 [file s1]

The wealth index was constructed from 21 items that had a loading on the first three factors of greater than 0.3 or less than -0.3. The binary items with positive loadings on factor 1 are: have electricity, have an electric or gas stove, cook with electricity, have a working refrigerator, have a working TV, flush toilet in house, live in a brick house, tap water inside the house, tap water in yard, flush toilet in yard, own a car, own a washing machine, own a microwave, own a computer, own a watch, own a vacuum cleaner, own a bicycle and the number of rooms in the house as an ordinal variable. The following items have negative loading on factor 1: drinking water comes from a communal tap, cook with paraffin and finally, the structure of the house is informal. Households were classified according to the asset index into quintiles.

Filmer, D.; Pritchett, L. Estimating wealth effects without expenditure data —or tears: with an application to educational enrollments in the states of India. *Demography*, **2001**, *38*, 115–132.

**Table S1.** Loading of household possessions included in the wealth index for 5 quintiles.

| Household Possessions (%) | Gauteng Wt% (95% CI) (N=733) | Western Cape Wt% (95% CI) (N=593) | ALL Wt% (95% CI) (N=1326) | Asset group 1 Wt% (20.0%) | Asset group 2 Wt% (20.0%) | Asset group 3 Wt% (19.5%) | Asset group 4 Wt% (20.5%) | Asset group 5 Wt% (20.0%) |
|---------------------------|------------------------------|-----------------------------------|---------------------------|---------------------------|---------------------------|---------------------------|---------------------------|---------------------------|
| Refrigerator              | 82.7 (78.4-86.9)             | 85.3 (79.2-91.3)                  | 83.5 (80.1-86.9)          | 42.9###                   | 75.5                      | 99.2                      | 100.0                     | 100.0                     |
| Stove (any type)          | 92.8 (88.6-97.0)             | 95.0 (92.7-97.4)                  | 93.5 (90.7-96.4)          | 69.1###                   | 98.4                      | 100.0                     | 100.0                     | 100.0                     |
| Microwave                 | 54.3 (46.9-61.6)###          | 68.1 (59.8-76.3)                  | 58.8 (53.3-64.4)          | 19.3###                   | 48.2                      | 39.0                      | 87.0                      | 99.3                      |
| Washing machine           | 41.3 (32.8-49.8)###          | 66.4 (57.5-75.4)                  | 49.6 (43.3-56.0)          | 13.7###                   | 39.8                      | 28.5                      | 68.1                      | 97.0                      |
| Vacuum cleaner            | 5.2 (1.6-8.9)###             | 22.8 (15.7-29.8)                  | 11.1 (7.8-14.4)           | 2.0###                    | 6.3                       | 8.9                       | 11.3                      | 26.8                      |
| Radio                     | 60.9 (55.7-66.1)             | 56.5 (49.0-64.0)                  | 59.4 (55.2-63.6)          | 43.9###                   | 50.3                      | 59.1                      | 70.3                      | 73.4                      |
| Television                | 88.4 (84.7-92.0)             | 91.3 (87.1-95.4)                  | 89.3 (86.6-92.1)          | 55.3###                   | 91.1                      | 100.0                     | 100.0                     | 100.0                     |
| Computer                  | 17.8 (12.2-23.4)###          | 29.6 (21.2-38.0)                  | 21.7 (17.1-26.3)          | 5.9###                    | 14.1                      | 12.3                      | 19.9                      | 56.2                      |
| Landline telephone        | 0.5 (0.0-1.1)###             | 11.0 (5.1-16.9)                   | 4.0 (2.1-5.9)             | 0.0###                    | 4.6                       | 0.6                       | 2.6                       | 12.0                      |
| Watch                     | 45.7 (38.3-53.2)###          | 63.4 (55.2-71.5)                  | 51.6 (46.0-57.2)          | 30.5###                   | 41.5                      | 42.0                      | 56.3                      | 87.4                      |
| Cell phone                | 97.0 (95.2-98.8)             | 95.5 (93.0-97.9)                  | 96.4 (95.1-97.9)          | 89.6###                   | 96.3                      | 98.5                      | 98.5                      | 99.5                      |
| Bicycle                   | 15.7 (11.8-19.6)###          | 32.0 (23.5-40.5)                  | 21.1 (17.3-24.9)          | 6.6###                    | 21.0                      | 11.1                      | 18.1                      | 48.6                      |
| Motorcycle                | 3.6 (1.7-5.6)###             | 11.1 (7.0-15.1)                   | 6.1 (4.3-7.9)             | 1.3###                    | 6.6                       | 3.5                       | 5.0                       | 14.1                      |
| Car                       | 27.1 (20.8-33.5)###          | 40.1 (30.9-49.3)                  | 31.4 (26.3-36.6)          | 9.2###                    | 19.3                      | 17.9                      | 32.9                      | 77.6                      |

|                                        |                     |                   |                  |                        |                        |                     |                        |                     |
|----------------------------------------|---------------------|-------------------|------------------|------------------------|------------------------|---------------------|------------------------|---------------------|
| Have electricity                       | 93.9 (89.7-98.0)### | 99.2 (98.3-100.0) | 95.7 (92.9-98.4) | 78.1###                | 100.0                  | 100.0               | 100.0                  | 100.0               |
| Main cooking fuel (%)                  | N=732               | N=588             | 1320             |                        |                        |                     |                        |                     |
| Electric                               | 91.7 (87.5-96.0)### | 84.0 (78.6-89.3)  | 89.2 (85.9-92.5) | 65.0###                | 81.9                   | 98.8                | 100.0                  | 100.0               |
| Gas                                    | 1.7 (0.5-2.9)       | 14.7 (9.5-19.8)   | 6.0 (4.1-7.9)    | 10.6                   | 18.1                   | 1.2                 | 0.0                    | 0.0                 |
| Paraffin                               | 6.1 (2.5-9.8)       | 0.2 (0.0-0.3)     | 4.2 (1.8-6.5)    | 21.0                   | 0.0                    | 0.0                 | 0.0                    | 0.0                 |
| Wood/coal                              | 0.4 (0.0-1.0)       | 1.2 (0.1-2.2)     | 0.7 (0.2-1.2)    | 3.4                    | 0.0                    | 0.0                 | 0.0                    | 0.0                 |
| Type of toilet (%)                     | N=733               | N=591             | 1324             |                        |                        |                     |                        |                     |
| Flush toilet in house                  | 57.5 (45.5-69.5)### | 80.2 (73.0-87.3)  | 65.0 (56.7-73.3) | 23.3###                | 55.9                   | 74.1                | 80.0                   | 91.6                |
| Pit latrine                            | 13.7 (5.4-22.0)     | 0.5 (0.1-0.8)     | 9.3 (3.8-14.8)   | 30.0                   | 10.7                   | 3.3                 | 1.5                    | 1.2                 |
| Bucket                                 | 0.6 (0.0-1.3)       | 2.4 (0.6-4.1)     | 1.2 (0.5-1.9)    | 4.8                    | 0.7                    | 0.6                 | 0.0                    | 0.0                 |
| Chemical toilet                        | 4.3 (2.2-6.3)       | 1.3 (0.0-3.8)     | 3.3 (1.7-4.9)    | 13.5                   | 2.3                    | 0.0                 | 0.0                    | 0.7                 |
| No facility                            | 0.6 (0.0-1.5)       | 0.1 (0.0-0.3)     | 0.5 (0.0-1.1)    | 1.0                    | 0.8                    | 0.5                 | 0.0                    | 0.0                 |
| Other (flush outside)                  | 23.3 (13.0-33.7)    | 15.5 (8.7-22.4)   | 20.8 (13.6-27.9) | 27.5                   | 29.7                   | 21.5                | 18.6                   | 6.4                 |
| Type of drinking water (%)             | N=733               | N=593             | 1326             |                        |                        |                     |                        |                     |
| Tap in house                           | 45.3 (35.1-55.5)### | 79.3 (73.5-85.1)  | 56.6 (49.5-63.6) | 24.4###                | 48.8                   | 61.3                | 72.3                   | 75.9                |
| Tap in yard                            | 45.6 (36.3-54.9)    | 8.6 (4.3-12.8)    | 33.3 (27.0-39.6) | 38.1                   | 47.4                   | 36.8                | 26.1                   | 18.0                |
| Communal tap                           | 8.8 (2.9-14.7)      | 4.5 (1.0-8.1)     | 7.4 (3.3-11.4)   | 36.1                   | 1.0                    | 0.0                 | 0.0                    | 0.0                 |
| Bottled water                          | 0.3 (0.0-0.8)       | 7.6 (2.8-12.3)    | 2.7 (1.2-4.3)    | 1.3                    | 2.8                    | 1.9                 | 1.6                    | 6.2                 |
| Other (e.g. river/dam)                 | -                   | 0.1 (0.0-0.1)     | 0.02 (0.0-0.04)  | 0.1                    | 0.0                    | 0.0                 | 0.0                    | 0.0                 |
| Type of dwelling (%)                   | N=733               | N=593             | 1326             |                        |                        |                     |                        |                     |
| Brick house/flat                       | 72.3 (63.0-81.7)### | 79.7 (73.8-85.6)  | 74.8 (68.3-81.2) | 24.7###                | 55.8                   | 93.5                | 99.9                   | 100.0               |
| Informal structure (shack/tin)         | 26.8 (17.6-36.0)    | 10.9 (5.1-13.7)   | 21.5 (15.3-27.8) | 69.0                   | 36.7                   | 1.9                 | 0.0                    | 0.0                 |
| Other (mud/wooden/other)               | 0.8 (0.0-1.8)       | 9.4 (6.4-15.5)    | 3.7 (2.1-5.3)    | 6.3                    | 7.5                    | 4.6                 | 0.1                    | 0.0                 |
| Mean number rooms in house (95% CI)    | 2.9 (2.6 – 3.1)     | 2.9 (2.6 – 3.3)   | 2.9 (2.7 – 3.1)  | 2.0 (1.8 – 2.2) [E]    | 2.4 (2.1 – 2.6) [D]    | 2.7 (2.4 – 3.0) [C] | 3.2 (2.9 – 3.4) [B]    | 4.2 (3.9 – 4.5) [A] |
| Mean number sleeping in house (95% CI) | 5.2 (4.9 – 5.5)###  | 5.8 (5.5 – 6.2)   | 5.4 (5.2 – 5.6)  | 4.8 (4.4 – 5.1) [C]    | 5.2 (4.8 – 5.7) [B][C] | 5.3 (5.0 – 5.7) [B] | 5.8 (5.5 – 6.4) [A][B] | 5.9 (5.4 – 6.2) [A] |
| Mean wealth index (95% CI)             | 0.5 (-0.2 – 1.2)### | 1.3 (0.9 – 1.7)   | 0.8 (0.3 – 1.2)  | -4.3 (-5.9 – -2.8) [D] | 0.6 (0.6 – 0.7) [C]    | 1.9 (1.9 – 1.9) [B] | 2.5 (2.5 – 2.5) [A]    | 3.0 (3.0 – 3.0) [A] |

###Significant relationship between the variable and the province / wealth index category, Chi-square p-value<0.0001. [A], [B], [C], [D], [E]: significant difference between the mean values for different wealth index groups, Bonferroni multiple comparison, p<0.05. &&&Significant difference between

two provinces, independent t-test,  $p < 0.0001$ . N-values reflect actual number of cases, estimates are adjusted using relevant weighting.

**Table S2.** Hunger scale items.

|                                                                                                                                     | YES | NO |
|-------------------------------------------------------------------------------------------------------------------------------------|-----|----|
| 1. Does your household ever run out of money to buy food?                                                                           |     |    |
| 1a Has it happened in the past 30 days?                                                                                             |     |    |
| 1b Has it happened 5 or more days in the past 30 days?                                                                              |     |    |
| 2. Do you ever rely on a limited number of foods to feed your children because you are running out of money to buy food for a meal? |     |    |
| 2a Has it happened in the past 30 days?                                                                                             |     |    |
| 2b Has it happened 5 or more days in the past 30 days?                                                                              |     |    |
| 3. Do you ever cut the size of meals or skip any because there is not enough food in the house?                                     |     |    |
| 3a Has it happened in the past 30 days?                                                                                             |     |    |
| 3b. Has it happened 5 or more days in the past 30 days?                                                                             |     |    |
| 4. Do you ever eat less than you should because there is not enough money for food?                                                 |     |    |
| 4a. Has it happened in the past 30 days?                                                                                            |     |    |
| 4b. Has it happened 5 or more days in the past 30 days?                                                                             |     |    |
| 5. Do your children ever eat less than you feel they should because there is not enough money for food?                             |     |    |
| 5a. Has it happened in the past 30 days?                                                                                            |     |    |
| 5b. Has it happened 5 or more days in the past 30 days?                                                                             |     |    |
| 6. Do your children ever say they are hungry because there is not enough food in the house?                                         |     |    |
| 6a. Has it happened in the past 30 days?                                                                                            |     |    |
| 6b. 5 or more days in the past 30 days?                                                                                             |     |    |
| 7. Do you ever cut the size of your children's meals or do they ever skip meals because there is not enough money to buy food?      |     |    |
| 7a. Has it happened in the past 30 days?                                                                                            |     |    |
| 7b. Has it happened 5 or more days in the past 30 days?                                                                             |     |    |
| 8. Do any of your children ever go to bed hungry because there is not enough money to buy food?                                     |     |    |
| 8a. Has it happened in the past 30 days?                                                                                            |     |    |
| 8b. Has it happened 5 or more days in the past 30 days?                                                                             |     |    |

#### Community Childhood Hunger Identification Project (CCHIP) questionnaire

Wehler, C.; Scott, R.; Anderson, J. The community childhood hunger identification project: a model of domestic hunger-demonstration. *J. Nutr. Education* **1992**, *24*, 295-355.

**Table S3.** NCI method used in the study.

|                                                                                                                                                                                                                                                                                                                                                                                                                                                                                                                                                                                                                                                                                                                                                                                                                                                                                                                                                                                                                                                                                                          |
|----------------------------------------------------------------------------------------------------------------------------------------------------------------------------------------------------------------------------------------------------------------------------------------------------------------------------------------------------------------------------------------------------------------------------------------------------------------------------------------------------------------------------------------------------------------------------------------------------------------------------------------------------------------------------------------------------------------------------------------------------------------------------------------------------------------------------------------------------------------------------------------------------------------------------------------------------------------------------------------------------------------------------------------------------------------------------------------------------------|
| <p>The National Cancer Institute (NCI) method [1] that was developed to distinguish within-person from between-person variation, account for extreme intakes, including zero intake, and allow for adjustment for covariates and association analyses. The NCI method is used to adjust the measurement of the observed single 24-hour dietary intake data using data from the PDIS study, to establish usual intake, and thereby improve the validity of the results. Two additional 24-hour dietary recalls were completed on a subsample of 148 (2nd recall) and 146 (3rd recall) children in the sample. The last five EAs in each province, mainly for logistical reasons, were visited three times a week apart for this purpose. Parents of children also needed to indicate whether the 24-hour recall was less, same or more than the child's usual intake. The data obtained from the three 24-hour recalls of the subsample were used to adjust the observed distributions of the single 24-hour recall completed by the larger sample for the effects of random within-person variation.</p> |
| <p>Using the NCI method, the available 3-day 24-hour recalls for the subgroup were used to estimate within-person variance and remove it from the first 24-hour recall. The Balanced Repeated Replication (BRR) method [2] was used to do variance estimation with a Fay coefficient</p>                                                                                                                                                                                                                                                                                                                                                                                                                                                                                                                                                                                                                                                                                                                                                                                                                 |

of 0.3. Two pseudo primary sampling units (PSU) were created per stratum by randomly selecting half of the PSU (or EA) in each stratum into one pseudo-PSU, and the rest in a second pseudo-PSU [2,3]. Therefore 6 original strata were maintained with 12 pseudo-PSUs, two per stratum. Consequently, 8 BRR weights were created, taking the original sampling weights as well as the age and gender of each child in consideration

When estimating usual intakes, covariates adjusted for in this study included province, type of residential area (urban formal, urban informal or rural), gender of the child and whether the intake of the 24-hour recall was less, the same or more than usual. The three age groups, namely 1 - <3-years, 3 - <6-years and 6 - <10-years were treated as subgroup options within the macros. The NCI method calculations should be interpreted at population level, and usual intakes for individuals within the group are not produced. The website accessed is:

<https://prevention.cancer.gov/research-groups/biometry/measurement-error-impact/software-measurement-error>,

and the software selected are for estimating usual intake distribution, specifically for single regularly-consumed nutrients, and the percentage of energy intake from selected macronutrients.

The macros used are the boxcox\_survey\_macro.v1.2.sas; brr\_pvalue\_ci\_macro.v1.1.sas; distrib\_bivariate\_macro.v1.2.sas; nlmixed\_bivariate\_macro.v1.2.sas; nlmixed\_univariate\_macro.v1.2.sas and percentiles\_survey\_macro.v1.1.sas.

The BRR weights were calculated using the technique described in Herrick et al. [4].

## References

1. Tooze, J.A.; Kipnis, V.; Buckman, D.W.; Carroll, R.J.; Freedman, L.S.; Guenther, P.M.; Krebs-Smith, S.M.; Subar, A.F.; Dodd, K.W. A mixed-effects model approach for estimating the distribution of usual intake of nutrients: The NCI method. *Stat. Med.* **2010**, *29*, 2857–2868, doi:10.1002/sim.4063.
2. Korn, E.L.; Graubard, B.I. *Analysis of health surveys*. John Wiley and Sons: New York, USA, 1999.
3. Judkins, D.R. Fay's method for variance estimation. *J. Off. Stat.* **1999**, *6*, 223–239.
4. Herrick, K.A.; Rossen, L.M.; Parsons, R.; Dodd, K.W. Estimating usual dietary intake from National Health and Nutrition Examination 5. Survey data using the National Cancer Institute method. National Center for Health Statistics. *Vital. Health. Stat.* **2018**, *2*, 1–63
5. National Cancer Institute. Software for measurement error in Nutrition Research, US Department of Health and Human Services, National Institutes of Health, Available online: <https://prevention.cancer.gov/research-groups/biometry/measurement-error-impact/software-measurement-error> (accessed on 20 January 2020)

**Table S4.** Sociodemographic and other characteristics of the 1-<10-year old children for the different dietary recalls.

| Variables                  | Recall 1<br>(N = 1326) | Recall 2 / 3<br>(N = 148) | Cochran-<br>Mantel-<br>Haenszel<br>(CMH) test* |
|----------------------------|------------------------|---------------------------|------------------------------------------------|
| <b>Primary caregiver</b>   |                        |                           |                                                |
| Mother                     | 70.4                   | 69.9                      | 0.482                                          |
| Father                     | 5.0                    | 1.4                       |                                                |
| Grandparent                | 18.1                   | 20.0                      |                                                |
| Other (e.g. sibling, aunt) | 6.6                    | 8.7                       |                                                |
| <b>Age in years</b>        |                        |                           |                                                |
| 1-<3-years                 | 26.0                   | 25.4                      | 0.735                                          |
| 3-<6-years                 | 35.3                   | 39.0                      |                                                |
| 6-<10-years                | 38.7                   | 35.6                      |                                                |
| <b>Gender</b>              |                        |                           |                                                |
| Male                       | 49.3                   | 54.3                      | 0.294                                          |

|                                            |      |      |          |
|--------------------------------------------|------|------|----------|
| Female                                     | 50.7 | 45.7 |          |
| <b>Head of household</b>                   |      |      |          |
| Father                                     | 39.7 | 37.4 | 0.574    |
| Mother                                     | 14.8 | 18.8 |          |
| Grandmother                                | 24.0 | 26.8 |          |
| Grandfather                                | 12.5 | 11.5 |          |
| Other (e.g. aunt, uncle)                   | 9.0  | 5.6  |          |
| <b>Marital status of mother</b>            |      |      |          |
| Unmarried                                  | 39.0 | 49.8 | 0.001**  |
| Married                                    | 30.4 | 32.0 |          |
| Divorced/ widowed                          | 4.0  | 3.8  |          |
| Living together                            | 25.5 | 14.5 |          |
| Other                                      | 1.2  | 0.0  |          |
| <b>Mother's highest level of education</b> |      |      |          |
| Did not complete grade 12                  | 55.9 | 57.4 | 0.603    |
| Completed grade 12                         | 30.8 | 31.2 |          |
| Qualification after grade 12               | 13.3 | 11.4 |          |
| <b>Father's highest level of education</b> |      |      |          |
| Did not complete grade 12                  | 29.1 | 29.8 | 0.601    |
| Completed grade 12                         | 31.9 | 35.3 |          |
| Qualification after grade 12               | 12.3 | 9.3  |          |
| Do not know                                | 26.7 | 25.7 |          |
| <b>Mother's employment status</b>          |      |      |          |
| Yes                                        | 27.7 | 20.9 | 0.250    |
| No                                         | 69.8 | 78.3 |          |
| Don't know/ not applicable                 | 2.5  | 0.8  |          |
| <b>Father's employment status (%)</b>      |      |      |          |
| Yes                                        | 65.0 | 62.6 | 0.444    |
| No                                         | 21.1 | 20.7 |          |
| Don't know/ not applicable                 | 13.9 | 16.7 |          |
| <b>Wealth index quintiles</b>              |      |      |          |
| One                                        | 20.0 | 18.6 | 0.724    |
| Two                                        | 20.0 | 20.4 |          |
| Three                                      | 19.9 | 25.2 |          |
| Four                                       | 20.2 | 18.5 |          |
| Five                                       | 20.0 | 17.4 |          |
| <b>Ethnicity</b>                           |      |      |          |
| Black African                              | 74.5 | 89.0 | 0.0007** |
| Mixed ancestry                             | 24.1 | 9.9  |          |
| Other                                      | 1.5  | 1.1  |          |
| <b>Province</b>                            |      |      |          |
| Gauteng Province                           | 66.8 | 62.2 | 0.303    |
| Western Cape                               | 33.2 | 37.8 |          |
| <b>Type of residence</b>                   |      |      |          |
| Rural                                      | 3.8  | 3.0  | 0.434    |
| Urban formal                               | 88.2 | 90.7 |          |
| Urban informal                             | 8.0  | 6.4  |          |
| <b>Mother's BMI [39]</b>                   |      |      |          |
| Underweight/normal                         | 32.0 | 33.2 | 0.939    |

|                                                                   |                               |                               |                              |                |
|-------------------------------------------------------------------|-------------------------------|-------------------------------|------------------------------|----------------|
| BMI=<18.5 & 18.5-24.9kgm <sup>2</sup>                             |                               |                               |                              |                |
| Overweight                                                        | 25.4                          | 23.6                          |                              |                |
| BMI= 25-29.9 kgm <sup>2</sup>                                     |                               |                               |                              |                |
| Obese                                                             | 42.6                          | 43.2                          |                              |                |
| BMI ≥ 30kgm <sup>2</sup>                                          |                               |                               |                              |                |
| <b>Hunger scale [25]</b>                                          |                               |                               |                              |                |
| Total score=0: No risk                                            | 54.9                          | 61.2                          |                              | 0.8813         |
| 1-4: At risk of hunger                                            | 24.4                          | 12.9                          |                              |                |
| 5-8: Food shortage in house                                       | 20.7                          | 25.9                          |                              |                |
| <b>What the child ate and drank the previous day, was it ...?</b> | First 24-hour recall (N=1326) | Second 24-hour recall (N=148) | Third 24-hour recall (N=146) | CMH Chi-Square |
|                                                                   | The same as usual             | 75.8                          | 79.7                         | 77.4           |
|                                                                   | More than usual               | 7.4                           | 8.1                          | 10.3           |
|                                                                   | Less than usual               | 16.8                          | 12.2                         | 12.3           |
|                                                                   |                               |                               |                              | P=0.18         |

\*CMH test: The Cochran–Mantel–Haenszel test is used for repeated data. It will establish whether there is a consistent difference in the weighted proportions across the repeats (<http://www.biostathandbook.com/cmh.html>).
